# Supplementary material
Source: publisher figshare collection journal article supplement (https://acs.figshare.com/ndownloader/files/4295242)
Supplement: Supplementary file 1 [file 4295242]

# **Non-orthogonality problem and effective electronic coupling calculation: Application to charge transfer in $\pi$ -stacks relevant to biochemistry and molecular electronics.**

Agostino Migliore<sup>\*,†</sup>

<sup>†</sup> *School of Chemistry, Tel Aviv University, Tel Aviv 69978, Israel. Phone: +972-3-6407634.*

*Fax: +972-3-6409293.*

\* E-mail: [migliore@post.tau.ac.il](mailto:migliore@post.tau.ac.il)

**TITLE RUNNING HEAD:** electronic couplings in molecular charge transfer.

**CORRESPONDING AUTHOR:** Agostino Migliore. School of Chemistry, Tel Aviv University, Tel Aviv 69978, Israel. Phone: +972-3-6407634. Fax: +972-3-6409293. E-mail: [migliore@post.tau.ac.il](mailto:migliore@post.tau.ac.il)

This file includes the values of the effective electronic couplings (or charge-transfer integrals) and the diabatic energy differences for the different conformations of the perylenediimide (PDI)  $\pi$ -stack (Table S1) and the quinol-semiquinone redox couple at different donor-acceptor distances  $R_{DA}$  (Table S2). The overlap integrals are also reported for the latter system.

**Table S1.** Charge-transfer integrals for hole ( $V_{\text{IF}}^{(h)}$ ) and electron transfer ( $V_{\text{IF}}^{(e)}$ ) in a PDI stack ( $x$  shift = 1.60 Å,  $y$  shift = 0.94 Å,  $z$  shift = 3.40 Å), and pertinent diabatic energy differences ( $\Delta E_{\text{IF}}^{(h)}$  and  $\Delta E_{\text{IF}}^{(e)}$ , respectively), at the nuclear coordinate sets  $Q_j = Q_t + j\delta Q/10$  ( $j = 1, \dots, 10$ ), where  $Q_t$  is the transition state coordinate and  $Q_t + \delta Q$  is the coordinate after geometry optimization on the H atoms of one PDI molecule at the BHH/6-31g\* computational level. The geometry optimization was not performed with a basis set of high accuracy, because the only purpose of this optimization was to move the system away from  $Q_t$ . These results were obtained by using the M06-2X hybrid function and the 6-311g\*\* basis set. All the energy quantities are given in meV.

| $j$ | $\Delta E_{\text{IF}}^{(h)}$ | $V_{\text{IF}}^{(h)}$ | $\Delta E_{\text{IF}}^{(e)}$ | $V_{\text{IF}}^{(e)}$ |
|-----|------------------------------|-----------------------|------------------------------|-----------------------|
| 1   | 0.04                         | 35.9                  | 0.10                         | 129.7                 |
| 2   | 0.08                         | 35.7                  |                              |                       |
| 3   | 0.12                         | 35.6                  |                              |                       |
| 4   | 0.16                         | 35.4                  |                              |                       |
| 5   | 0.20                         | 35.6                  | 0.48                         | 128.8                 |
| 6   | 0.24                         | 35.4                  |                              |                       |
| 7   | 0.28                         | 35.4                  |                              |                       |
| 8   | 0.32                         | 35.4                  |                              |                       |
| 9   | 0.36                         | 35.4                  |                              |                       |
| 10  | 0.40                         | 35.2                  | 0.95                         | 127.6                 |

**Table S2.** Effective electronic couplings ( $V_{\text{IF}}$ ), diabatic energy differences ( $|\Delta E_{\text{IF}}| \equiv |E_{\text{I}} - E_{\text{F}}| = -\Delta E_{\text{IF}}$ ), and overlap integrals ( $S_{\text{IF}} \equiv \langle \psi_{\text{I}} | \psi_{\text{F}} \rangle$ ) for electron transfer in the quinol-semiquinol redox couple at the indicated donor-acceptor distances ( $R_{\text{DA}}$ ). The pertinent calculations were performed using the M06-HF XC hybrid functional, with the aug-cc-pVTZ basis set for the O atoms and the cc-pVTZ basis set for the other atoms. All the energy quantities are reported in eV.

| $R_{\text{DA}} (\text{\AA})$ | $V_{\text{IF}}$      | $-\Delta E_{\text{IF}}$ | $S_{\text{IF}}$       |
|------------------------------|----------------------|-------------------------|-----------------------|
| 1.54                         | 17.2                 | 0.005                   | 0.949                 |
| 2.0                          | 7.9                  | 0.113                   | 0.915                 |
| 2.5                          | 1.5                  | 0.298                   | 0.628                 |
| 3.0                          | $3.9 \times 10^{-1}$ | 0.371                   | 0.356                 |
| 3.5                          | $1.3 \times 10^{-1}$ | 0.401                   | 0.173                 |
| 4.0                          | $5.9 \times 10^{-2}$ | 0.412                   | $8.39 \times 10^{-2}$ |
| 4.5                          | $2.9 \times 10^{-2}$ | 0.417                   | $3.81 \times 10^{-2}$ |
| 5.0                          | $1.4 \times 10^{-2}$ | 0.419                   | $1.68 \times 10^{-2}$ |
| 5.5                          | $6.1 \times 10^{-3}$ | 0.422                   | $7.04 \times 10^{-3}$ |
| 6.0                          | $2.3 \times 10^{-3}$ | 0.424                   | $2.79 \times 10^{-3}$ |
| 6.5                          | $6.2 \times 10^{-4}$ | 0.427                   | $8.56 \times 10^{-4}$ |
| 7.0                          | $7.7 \times 10^{-5}$ | 0.427                   | $1.13 \times 10^{-4}$ |
